# Supplementary material for: Completely green synthesis of rose-shaped Au nanostructures and their catalytic applications
Source: Royal Society of Chemistry journal article supplement (doi:10.1039/d1ra06805a), 2021-01-01
Supplement: d1ra06805a1.pdf [file d1ra06805a1.pdf]

# **Completely Green Synthesis of Rose-Shaped Au Nanostructures and Their Catalytic Applications**

Jae Hwan Jeong,<sup>a</sup> Astrini Pradyasti,<sup>a</sup> Hyeonbo Shim,<sup>a</sup> Hee-Chul Woo,<sup>b</sup> Mun Ho Kim<sup>a,\*</sup>

<sup>a</sup>Department of Polymer Engineering, Pukyong National University, 45 Yongso-ro, Nam-gu,  
Busan 48513, Republic of Korea

<sup>b</sup>Department of Chemical Engineering, Pukyong National University, 45 Yongso-ro, Nam-gu,  
Busan 48513, Republic of Korea

\* Corresponding author: M. H. Kim (munho@pknu.ac.kr)

(Tel.; +82-51-629-6459, Fax; +82-51-629-6429)

## Supporting Tables

**Table S1.** Values of the activity parameter,  $\kappa$ , for various heterogeneous catalysts; the values of  $\kappa$  were obtained by dividing the reaction rate constant by the total weight of used catalyst.

| Catalysts                                                          | Total weight of used catalyst [mg] | Reaction rate constant (k) [ $10^{-3} \text{ s}^{-1}$ ] | k [ $\text{s}^{-1}\text{g}^{-1}$ ] | Ref.      |
|--------------------------------------------------------------------|------------------------------------|---------------------------------------------------------|------------------------------------|-----------|
| Smooth-edged Au nanostructures                                     | 0.28                               | 1.7                                                     | <b>6.07</b>                        | 1         |
| CuNPs                                                              | 1                                  | 7.11                                                    | <b>7.11</b>                        | 2         |
| PtAu core-shell NPs                                                | 0.5                                | 5.92                                                    | <b>11.8</b>                        | 3         |
| Jagged-edged Au nanostructures                                     | 0.16                               | 2.18                                                    | <b>13.6</b>                        | 1         |
| Multiply-stacked Au nanostructures                                 | 0.26                               | 4.8                                                     | <b>18.5</b>                        | 1         |
| Coffee arabica seed extract stabilized Au nanoparticles            | 2.76                               | 66.3                                                    | <b>24</b>                          | 4         |
| PtPd bimetallic nanoparticles                                      | 0.08                               | 2.31                                                    | <b>28.9</b>                        | 5         |
| CuO nanosheets                                                     | 0.1                                | 4.58                                                    | <b>45.8</b>                        | 6         |
| Citrate stabilized Au nanoparticles                                | 2.76                               | 140                                                     | <b>50.8</b>                        | 4         |
| Avocado seed extract stabilized Au nanoparticles                   | 0.03                               | 1.55                                                    | <b>51.7</b>                        | 7         |
| Porous and Solid Au nanoparticles                                  | 0.05                               | 4.6                                                     | <b>92</b>                          | 8         |
| Poly(diallyldimethylammonium chloride)-stabilized Pt nanoparticles | 0.286                              | 30                                                      | <b>105</b>                         | 9         |
| NiAu core-shell nanoparticles                                      | 0.06                               | 6.4                                                     | <b>107</b>                         | 10        |
| Porous AuPt microparticles                                         | 0.5                                | 55                                                      | <b>110</b>                         | 11        |
| PtAu alloy nanocubes                                               | 0.04                               | 5.91                                                    | <b>147.8</b>                       | 12        |
| AgNi Alloy                                                         | 0.2                                | 31.1                                                    | <b>156</b>                         | 13        |
| Hollow porous Cu particles                                         | 0.05                               | 9.3                                                     | <b>186</b>                         | 14        |
| Poly(diallyldimethylammonium chloride)-stabilized Pd nanoparticles | 0.292                              | 57                                                      | <b>195</b>                         | 9         |
| Porous and hollow Au nanoparticles                                 | 0.05                               | 12.1                                                    | <b>242</b>                         | 8         |
| Rose-shaped Au nanostructures                                      | 0.06                               | 17.4                                                    | <b>290</b>                         | This work |

## Supporting Figures

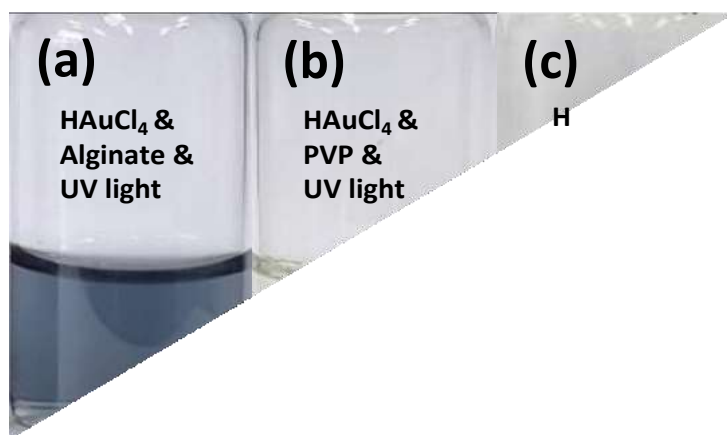

**Fig. S1.** Photographs of the reaction mixtures without (a) PVP or (b) Na-alginate and aged under UV irradiation for 3 h at room temperature. (c) Photograph of the reaction mixture including Na-alginate and PVP and aged in a dark room for 3 h at room temperature.

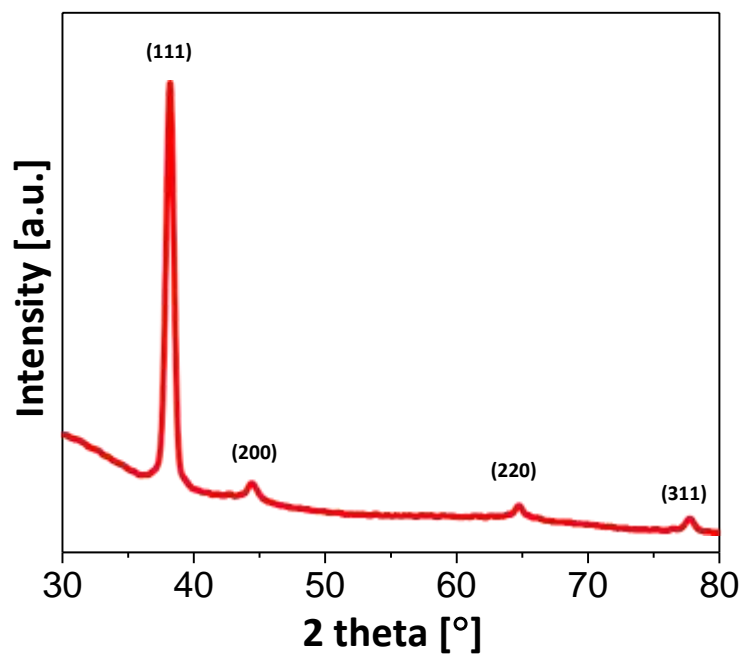

**Fig. S2.** XRD pattern of the rose-shaped Au nanostructures shown in Fig. 1.

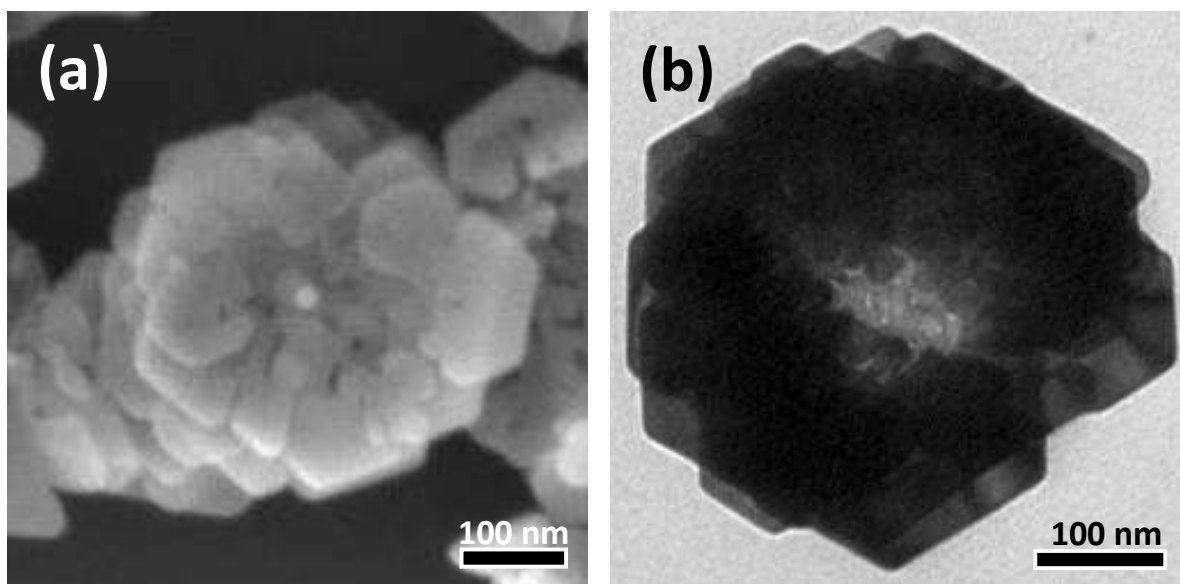

**Fig. S3.** (a) SEM and (b) TEM images of the rose-shaped Au nanostructures after aging at room temperature over 3 months.

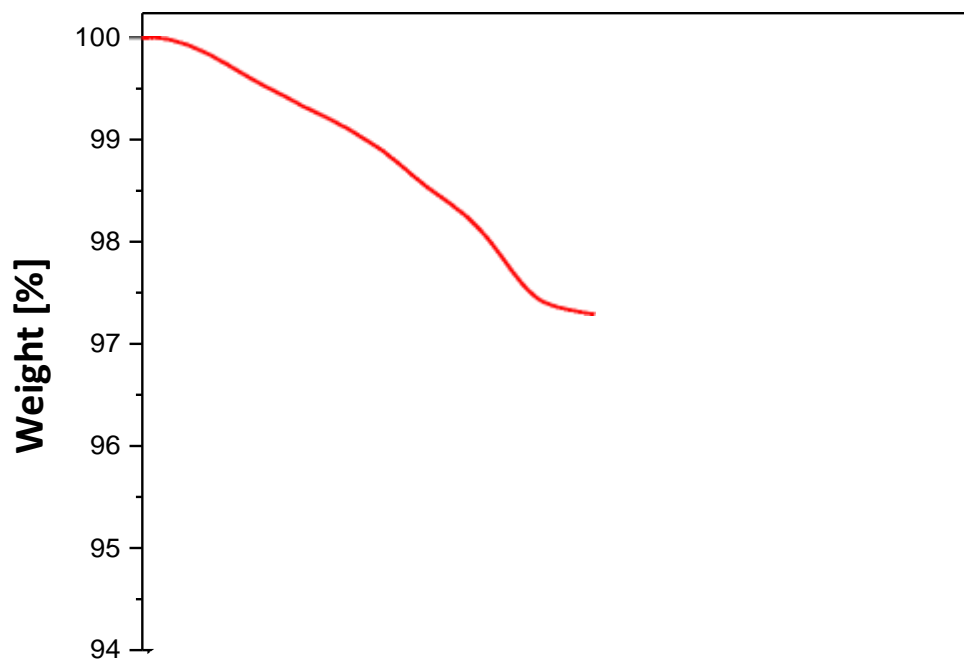

**Fig. S4.** TGA curve of the rose-shaped Au nanostructures after the complete drying of water.

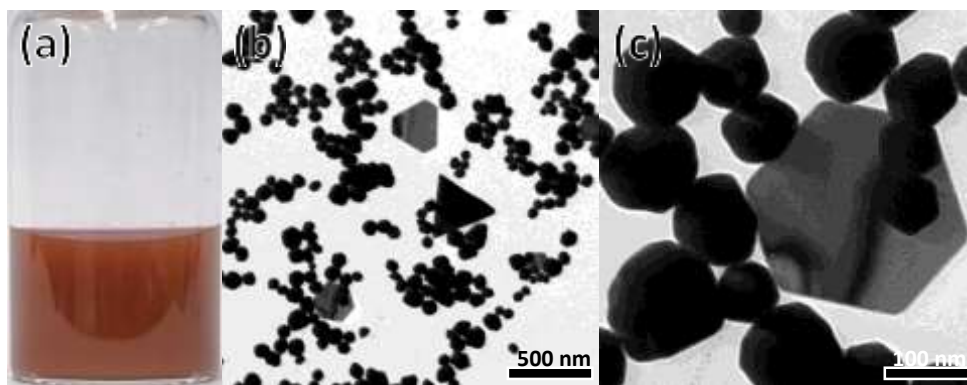

**Fig. S5.** (a) Photograph of the reaction mixture containing  $\text{HAuCl}_4$  and PVP but excluding Na-alginate, aged under UV irradiation for 3 h at room temperature. In the reaction, the PVP-to- $\text{HAuCl}_4$  weight ratio was approximately 18. (b)–(c) TEM images of the Au nanostructures shown in (a).

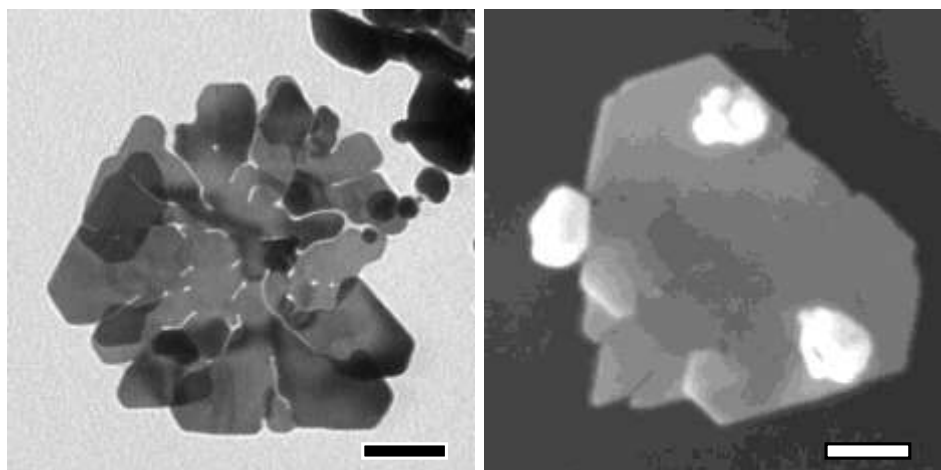

**Fig. S6.** (a) TEM and (b) SEM images of Au nanostructures grown for 1.5 h under UV irradiation at room temperature. The scale bar indicates 100 nm.



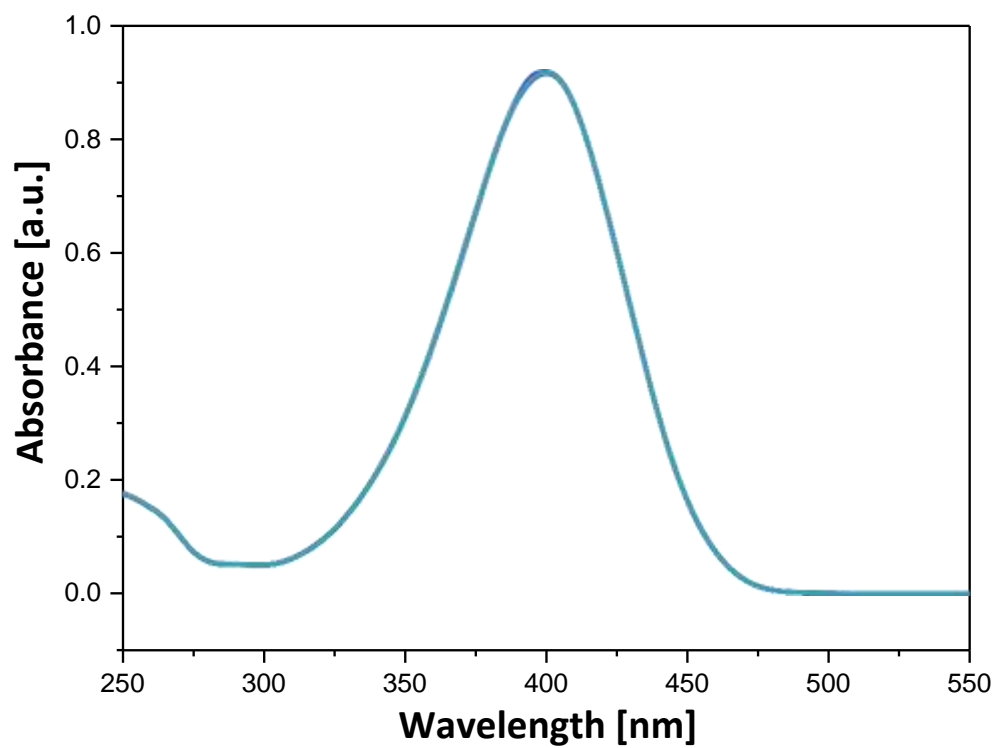

**Fig. S7.** UV–Vis absorption spectra of the solution containing 4-NP and NaBH<sub>4</sub>, as recorded after the reaction proceeded for 210 s.

## References

- 1 E. J. Jeong, E. Im, D. C. Hyun, J. W. Lee and G. D. Moon, *J. Ind. Eng. Chem.*, 2020, **89**, 204–211.
- 2 A. K. Sasmal, S. Dutta and T. Pal, *Dalt. Trans.*, 2016, **45**, 3139–3150.
- 3 Z. S. Lv, X. Y. Zhu, H. Bin Meng, J. J. Feng and A. J. Wang, *J. Colloid Interface Sci.*, 2019, **538**, 349–356.
- 4 N. K. R. Bogireddy, U. Pal, L. M. Gomez and V. Agarwal, *RSC Adv.*, 2018, **8**, 24819–24826.
- 5 B. Zhang, X. Zhan, P. Zhao and Z. Li, *RSC Adv.*, 2015, **5**, 57640–57646.
- 6 K. Sahu, J. Singh and S. Mohapatra, *Opt. Mater. (Amst.)*, 2019, **93**, 58–69.
- 7 N. K. R. Bogireddy and V. Agarwal, *RSC Adv.*, 2019, **9**, 39834–39842.
- 8 Q. Zhang, B. Zang and S. Wang, *RSC Adv.*, 2019, **9**, 23081–23085.
- 9 J. G. You, C. Shanmugam, Y. W. Liu, C. J. Yu and W. L. Tseng, *J. Hazard. Mater.*, 2017, **324**, 420–427.
- 10 X. Le, Z. Dong, W. Zhang, X. Li and J. Ma, *J. Mol. Catal. A Chem.*, 2014, **395**, 58–65.
- 11 A. Ma, J. Xu, X. Zhang, B. Zhang, D. Wang and H. Xu, *Sci. Rep.*, 2014, **4**, 4849.
- 12 G. Fu, L. Ding, Y. Chen, J. Lin, Y. Tang and T. Lu, *CrystEngComm*, 2014, **16**, 1606–1610.
- 13 M. Kumar and S. Deka, *ACS Appl. Mater. Interfaces*, 2014, **6**, 16071–16081.

- 14 J. Jiang, Y. Soo Lim, S. Park, S. H. Kim, S. Yoon and L. Piao, *Nanoscale*, 2017, **9**, 3873–3880.
